# Supplementary material for: Novel Honokiol-eluting PLGA-based scaffold effectively restricts the growth of renal cancer cells
Source: PubMed Central journal article supplement (PMC7746163; doi:10.1371/journal.pone.0243837), 2020-12-17
Supplement: pone.0243837.s001.pdf [file pone.0243837.s001.pdf]

|    | Area     | Mean    | Min     | Max     | Angle   | Length  |
|----|----------|---------|---------|---------|---------|---------|
| 1  | 5486.968 | 126.584 | 75      | 185.014 | -46.169 | 430.823 |
| 2  | 5791.8   | 143.97  | 108.501 | 175.019 | 37.185  | 457.661 |
| 3  | 5639.384 | 145.683 | 98.667  | 217.01  | 36.254  | 447.785 |
| 4  | 6249.047 | 123.381 | 75.111  | 160.262 | -53.13  | 493.827 |
| 5  | 5791.8   | 132.293 | 73.667  | 170.917 | -30.7   | 457.364 |
| 6  | 5486.968 | 111.52  | 87.429  | 150.183 | 42.709  | 430.823 |
| 7  | 5486.968 | 129.53  | 89.2    | 150.678 | 41.496  | 432.079 |
| 8  | 5486.968 | 129.53  | 89.2    | 150.678 | 41.496  | 432.079 |
| 9  | 4572.474 | 141.235 | 107.876 | 186.02  | 29.249  | 361.391 |
| 10 | 4877.305 | 133.932 | 80.889  | 172.601 | -43.668 | 384.284 |
| 11 | 4877.305 | 138.402 | 99.667  | 175.449 | 65.095  | 382.871 |
| 12 | 5029.721 | 134.632 | 81.111  | 189.667 | -48.814 | 396.431 |
| 13 | 5029.721 | 140.289 | 83.292  | 206.5   | -65.854 | 397.796 |
| 14 | 5029.721 | 121.788 | 78.333  | 165.667 | -70.463 | 400.849 |
| 15 | 5486.968 | 138.309 | 101.299 | 165.684 | 42.709  | 430.823 |
| 16 | 5486.968 | 115.792 | 89.333  | 167.162 | 15.255  | 427.35  |
| 17 | 6249.047 | 145.433 | 106.889 | 195.018 | 53.13   | 493.827 |
| 18 | 4724.889 | 153.477 | 112.056 | 186.889 | 45      | 372.468 |
| 19 | 5182.137 | 120.501 | 73.556  | 152.954 | 95.194  | 412.837 |
| 20 | 4724.889 | 141.163 | 110.987 | 185.72  | -57.381 | 369.913 |
| 21 | 5486.968 | 140.456 | 112.216 | 181.766 | 16.39   | 432.079 |
| 22 | 5182.137 | 120.809 | 88.556  | 154.403 | 54.866  | 401.862 |
| 23 | 5944.216 | 149.895 | 124.297 | 188.318 | -16.991 | 463.543 |
| 24 | 6249.047 | 127.024 | 86.333  | 169.333 | 0       | 493.827 |
| 25 | 5486.968 | 119.403 | 70.333  | 209.722 | -6.71   | 430.823 |
| 26 | 5029.721 | 139.744 | 78      | 196.667 | -64.983 | 397.796 |
| 27 | 5334.553 | 133.788 | 79.778  | 177.533 | -54.462 | 424.806 |
| 28 | 5639.384 | 136.931 | 98.889  | 192.111 | 90      | 444.444 |
| 29 | 3810.395 | 127.154 | 82.222  | 165.167 | 43.264  | 291.223 |
| 30 | 6096.632 | 134.453 | 89.715  | 169.627 | 16.144  | 479.349 |
| 31 | 6249.047 | 133.315 | 88.667  | 188.19  | -45     | 488.864 |
| 32 | 5791.8   | 120.98  | 96.111  | 145.485 | 38.418  | 457.661 |
| 33 | 5182.137 | 120.203 | 89.963  | 161.697 | 0       | 411.523 |
| 34 | 5791.8   | 99.221  | 75.485  | 140.229 | 52.524  | 457.661 |
| 35 | 5486.968 | 134.857 | 106.64  | 179.122 | 53.13   | 434.58  |
| 36 | 5486.968 | 139.169 | 100.4   | 194.187 | -33.232 | 429.248 |
| 37 | 6249.047 | 135.679 | 67.333  | 206.333 | -42.955 | 489.418 |
| 38 | 6249.047 | 147.94  | 67.333  | 255     | -42.955 | 489.418 |
| 39 | 6401.463 | 112.763 | 73.84   | 162.545 | -9.926  | 500.639 |
| 40 | 5182.137 | 104.299 | 77.744  | 155.758 | 75.964  | 407.22  |

**Figure-1D Control Fibers**

PLGA fibers

Figure-1D Control Fibers

| PLGA fibers | Figure-1D Control Fibers | Average | SD         | error      |
|-------------|--------------------------|---------|------------|------------|
| 430.823     | 337.029                  | 362.136 | 40.6993748 | 3.71193808 |
| 457.661     | 430.485                  | 426.124 |            |            |
| 447.785     | 387.577                  | 419.75  |            |            |
| 493.827     | 366.768                  | 371.383 |            |            |
| 457.364     | 410.524                  | 386.079 |            |            |
| 430.823     | 405.447                  | 425.716 |            |            |
| 432.079     | 388.42                   | 420.578 |            |            |
| 432.079     | 383.903                  | 442.346 |            |            |
| 361.391     | 397.299                  | 383.366 |            |            |
| 384.284     | 414.488                  | 416.422 |            |            |
| 382.871     | 347.539                  | 350.419 |            |            |
| 396.431     | 406.253                  | 364.768 |            |            |
| 397.796     | 417.632                  | 391.67  |            |            |
| 400.849     | 376.448                  | 356.326 |            |            |
| 430.823     | 378.182                  | 375.111 | 250-300    | 1          |
| 427.35      | 419.715                  | 359.968 | 300-350    | 4          |
| 493.827     | 416.848                  | 377.192 | 350-400    | 51         |
| 372.468     | 369.138                  | 392.114 | 400-450    | 45         |
| 412.837     | 357.13                   | 396.744 | 450-500    | 18         |
| 369.913     | 446.886                  | 318.98  | 500-550    | 1          |
| 432.079     | 386.451                  | 364.768 |            |            |
| 401.862     | 376.448                  | 362.855 |            |            |
| 463.543     | 403.291                  | 348.428 |            |            |
| 493.827     | 444.194                  | 397.619 |            |            |
| 430.823     | 445.175                  | 355.103 |            |            |
| 397.796     | 458.683                  | 356.326 |            |            |
| 424.806     | 431.244                  | 374.879 |            |            |
| 444.444     | 410.258                  | 421.404 |            |            |
| 291.223     | 392.329                  | 417.048 |            |            |
| 479.349     | 389.821                  | 393.442 |            |            |
| 488.864     | 369.138                  | 377.883 |            |            |
| 457.661     | 387.577                  | 398.712 |            |            |
| 411.523     | 401.665                  | 351.163 |            |            |
| 457.661     | 383.903                  | 421.404 |            |            |
| 434.58      | 454.864                  | 396.744 |            |            |
| 429.248     | 426.158                  | 354.858 |            |            |
| 489.418     | 429.217                  |         |            |            |
| 489.418     | 475.486                  |         |            |            |
| 500.639     | 373.252                  |         |            |            |
| 407.22      | 436.607                  |         |            |            |
| 485.693     | 450.141                  |         |            |            |
| 390.938     | 454.18                   |         |            |            |

Count of PLGA fibers

| Row Labels  | Total |
|-------------|-------|
| 250-300     | 1     |
| 300-350     | 4     |
| 350-400     | 51    |
| 400-450     | 45    |
| 450-500     | 18    |
| 500-550     | 1     |
| Grand Total | 120   |

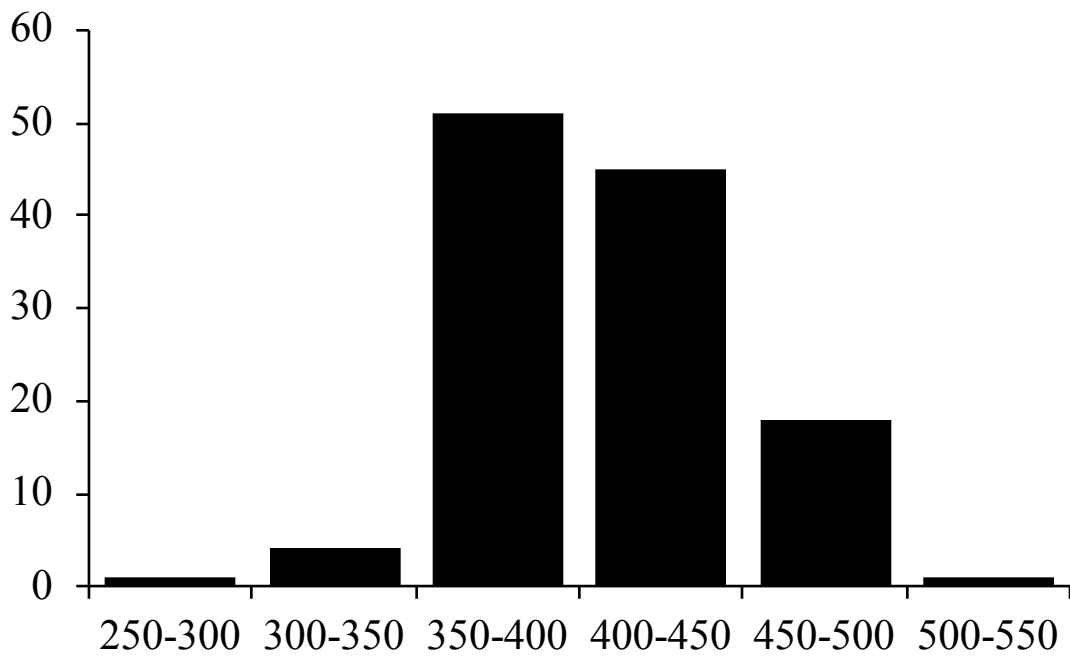

Figure-1D Control Fibers

|    | Area     | Mean    | Min     | Max     | Angle   | Length  |
|----|----------|---------|---------|---------|---------|---------|
| 1  | 4235.847 | 142.024 | 63      | 244.02  | 47.386  | 373.965 |
| 2  | 4477.896 | 133.73  | 83.296  | 193.358 | -26.565 | 393.587 |
| 3  | 3993.799 | 144.427 | 96      | 235.688 | 60.255  | 354.775 |
| 4  | 4114.823 | 120.967 | 84.185  | 166.259 | 0       | 366.703 |
| 5  | 4840.968 | 128.143 | 88.553  | 224.124 | 49.236  | 426.386 |
| 6  | 4719.944 | 136.459 | 83      | 187.383 | -80.789 | 414.877 |
| 7  | 3509.702 | 133.704 | 88.483  | 198.98  | 45      | 311.158 |
| 8  | 4114.823 | 138.278 | 96.31   | 190.429 | 53.471  | 366.703 |
| 9  | 3993.799 | 123.029 | 96      | 152.667 | 82.875  | 354.775 |
| 10 | 4719.944 | 124.59  | 72.232  | 198.269 | 9.211   | 417.205 |
| 11 | 3993.799 | 146.386 | 84.75   | 220     | -47.49  | 353.255 |
| 12 | 3993.799 | 140.497 | 99.25   | 220     | 63.435  | 347.731 |
| 13 | 4840.968 | 142.033 | 71.667  | 208.054 | 72.031  | 431.403 |
| 14 | 3630.726 | 138.591 | 89.333  | 213.4   | 37.694  | 313.912 |
| 15 | 4114.823 | 129.654 | 82.333  | 183     | 40.03   | 364.349 |
| 16 | 4719.944 | 132.54  | 85      | 207.526 | 48.24   | 415.396 |
| 17 | 4719.944 | 131.795 | 79.111  | 191.379 | -23.199 | 414.099 |
| 18 | 4477.896 | 137.52  | 68.333  | 191.704 | -93.18  | 396.311 |
| 19 | 4477.896 | 117.823 | 76.753  | 180.852 | -1.591  | 396.311 |
| 20 | 4235.847 | 133.79  | 82      | 174.667 | -69.444 | 375.974 |
| 21 | 4719.944 | 121.293 | 86      | 182.994 | -7.696  | 414.877 |
| 22 | 4477.896 | 120.275 | 66.83   | 192.248 | 30.964  | 394.952 |
| 23 | 4235.847 | 133.424 | 88.321  | 191.79  | -6.911  | 369.334 |
| 24 | 4477.896 | 149.916 | 114.593 | 199.423 | 75.579  | 394.952 |
| 25 | 4356.871 | 112.657 | 74      | 166.429 | -36.87  | 387.25  |
| 26 | 4356.871 | 152.274 | 81      | 201.849 | 81.87   | 385.858 |
| 27 | 3630.726 | 149.561 | 125.605 | 170.225 | -50.44  | 323.032 |
| 28 | 3993.799 | 145.203 | 86      | 209.802 | 68.199  | 348.658 |
| 29 | 3872.775 | 114.063 | 85      | 150.303 | -30.651 | 342.117 |
| 30 | 4477.896 | 104.363 | 80.333  | 139.649 | 23.806  | 400.631 |
| 31 | 4477.896 | 124.234 | 58.37   | 168.556 | -97.907 | 400.362 |
| 32 | 4114.823 | 102.249 | 69.444  | 127.376 | 12.339  | 359.594 |
| 33 | 4719.944 | 97.427  | 73.437  | 128.492 | -13.325 | 423.348 |
| 34 | 3630.726 | 133.574 | 68.333  | 183.579 | -90     | 322.699 |
| 35 | 4356.871 | 106.093 | 73.667  | 139.741 | 6.52    | 383.902 |
| 36 | 4114.823 | 125.292 | 79.412  | 145.646 | -77.661 | 359.594 |
| 37 | 3993.799 | 120.505 | 65.667  | 184.333 | 42.51   | 353.255 |
| 38 | 3872.775 | 119.381 | 78.778  | 198.083 | -9.162  | 342.431 |
| 39 | 4356.871 | 112.389 | 80.874  | 159.08  | -8.13   | 385.858 |
| 40 | 4356.871 | 119.344 | 69.703  | 213.677 | 6.52    | 383.902 |

**Figure-1D-Honokiol Fibers**

PLGA-Honokiol 0.2

**Figure-1D**

|         |         |         |
|---------|---------|---------|
| 373.965 | 405.033 | 403.031 |
| 393.587 | 388.873 | 423.205 |
| 354.775 | 408.723 | 378.995 |
| 366.703 | 409.057 | 436.814 |
| 426.386 | 374.572 | 399.495 |
| 414.877 | 430.832 | 393.232 |
| 311.158 | 397.894 | 313.433 |
| 366.703 | 385.702 | 407.407 |
| 354.775 | 408.723 | 384.107 |
| 417.205 | 397.894 | 418.147 |
| 353.255 | 424.77  | 414.313 |
| 347.731 | 421.221 | 358.311 |
| 431.403 | 418.295 | 407.407 |
| 313.912 | 385.702 | 395.48  |
| 364.349 | 401.989 | 470.81  |
| 415.396 | 392.715 | 378.526 |
| 414.099 | 541.194 | 411.306 |
| 396.311 | 399.605 | 402.591 |
| 396.311 | 380.357 | 399.051 |
| 375.974 | 413.041 | 376.648 |
| 414.877 | 399.605 | 411.306 |
| 394.952 | 387.114 | 351.818 |
| 369.334 | 450.953 | 407.407 |
| 394.952 | 479.128 | 407.407 |
| 387.25  | 421.221 | 372.862 |
| 385.858 | 491.224 | 413.027 |
| 323.032 | 414.361 | 413.456 |
| 348.658 | 386.762 | 407.407 |
| 342.117 | 385.348 | 399.051 |
| 400.631 | 399.264 | 418.147 |
| 400.362 | 475.697 | 421.105 |
| 359.594 | 423.16  | 407.407 |
| 423.348 | 454.57  | 399.051 |
| 322.699 | 413.371 | 418.147 |
| 383.902 | 462.901 | 418.147 |
| 359.594 | 394.103 | 465.126 |
| 353.255 | 421.221 |         |
| 342.431 | 439.923 |         |
| 385.858 | 438.03  |         |
| 383.902 | 418.147 |         |
| 408.723 | 416.873 |         |
| 413.041 | 413.027 |         |

Average

399.6885

SD

error

35.5080313

3.24142494

Count of PLGA-Honokiol 0.2

Row Labels Total

300-350

9

350-400

50

400-450

52

450-500

8

500-550

1

Grand Total

120

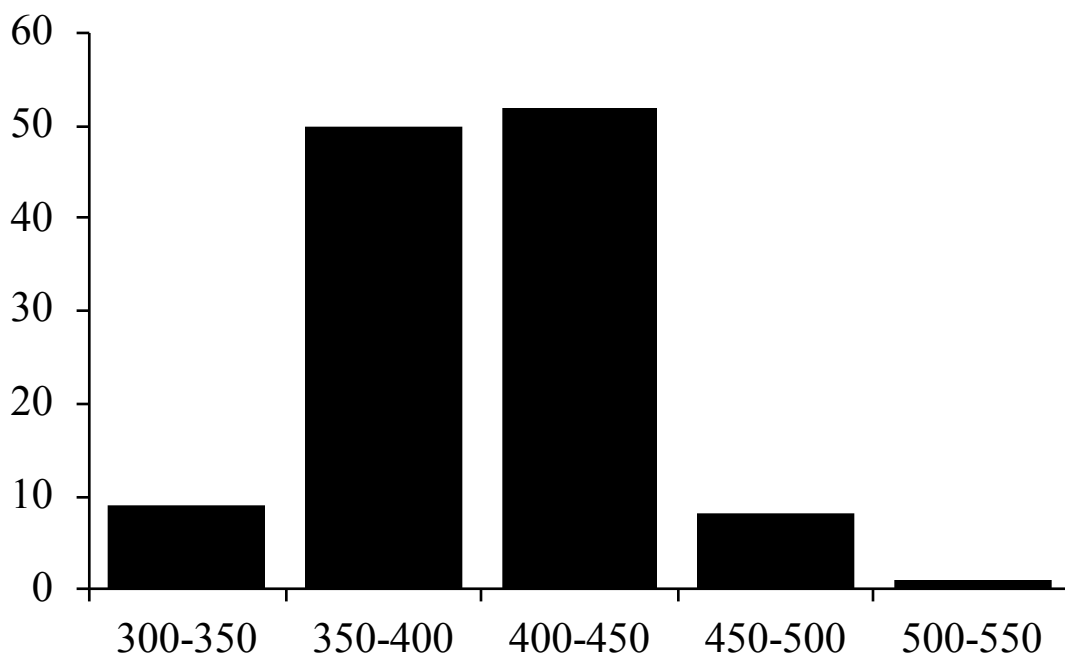

Figure-1D-Honokiol Fibers

| Time (minutes) | Concentration | Percentage of HNK released |
|----------------|---------------|----------------------------|
| 5              | 4.07352941    | 0.354133109                |
| 10             | 6.83823529    | 0.594483378                |
| 15             | 9.5           | 0.825884435                |
| 30             | 25.5882353    | 2.224518448                |
| 45             | 36.4411765    | 3.1680211                  |
| 60             | 42.1911765    | 3.667898521                |
| 90             | 58.2941176    | 5.067810993                |
| 120            | 67.7794118    | 5.892416969                |
| 180            | 93.1470588    | 8.097758534                |
| 240            | 111.852941    | 9.723958227                |
| 360            | 149.411765    | 12.9891422                 |
| 1440           | 309.220588    | 26.88215483                |
| 2880           | 442.240196    | 38.44624154                |

**Figure-2B**  
**DATA SET 1**  
**Cumulative release of Honokiol in 200 uL**

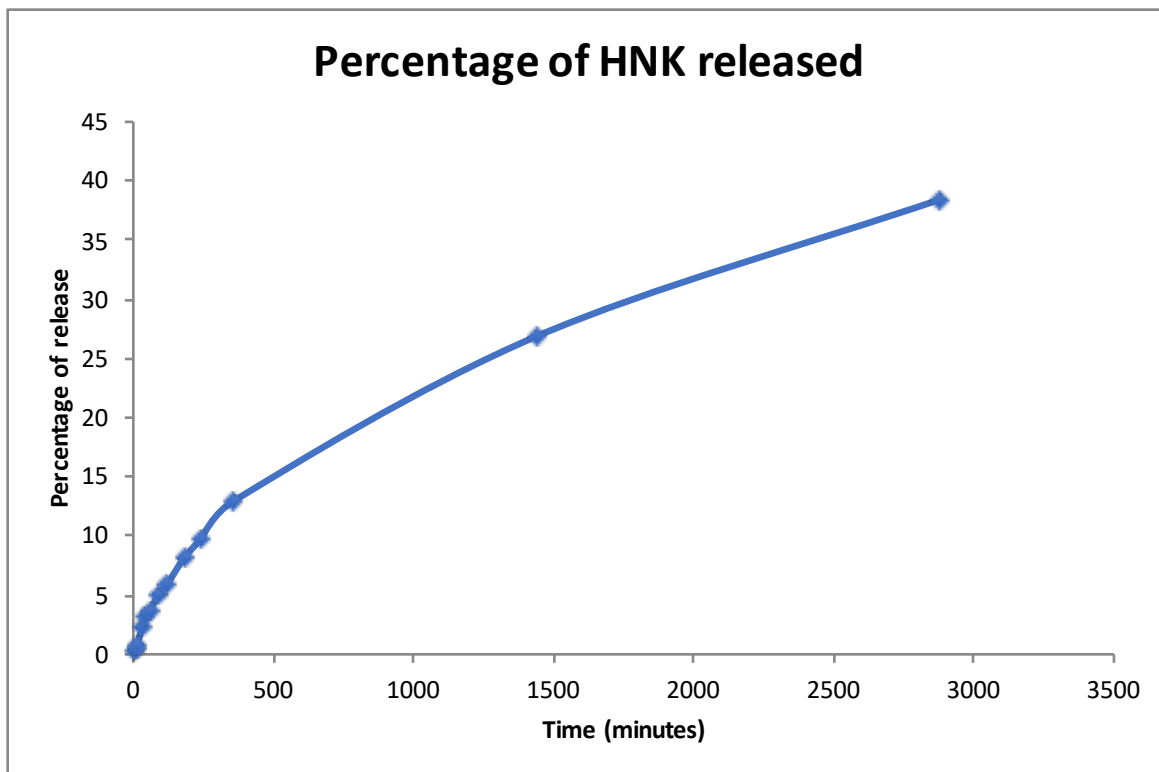

| Concentration | Absorbance | SD        | Error    |
|---------------|------------|-----------|----------|
| 0.1           | 0.171      | 0.009     | 0.005508 |
| 0.5           | 0.173667   | 0.0116667 | 0        |
| 1             | 0.1736     | 0.0116    | 0.001528 |
| 2.5           | 0.1706     | 0.0086    | 0.003786 |
| 5             | 0.182333   | 0.0203333 | 0.005859 |
| 7.5           | 0.180667   | 0.0186667 | 0.002082 |
| 10            | 0.189      | 0.027     | 0.004583 |
| 12.5          | 0.19       | 0.028     | 0.001    |
| 15            | 0.199667   | 0.0376667 | 0.006429 |
| 17.5          | 0.201      | 0.039     | 0.002646 |
| 20            | 0.204667   | 0.0426667 | 0.004041 |

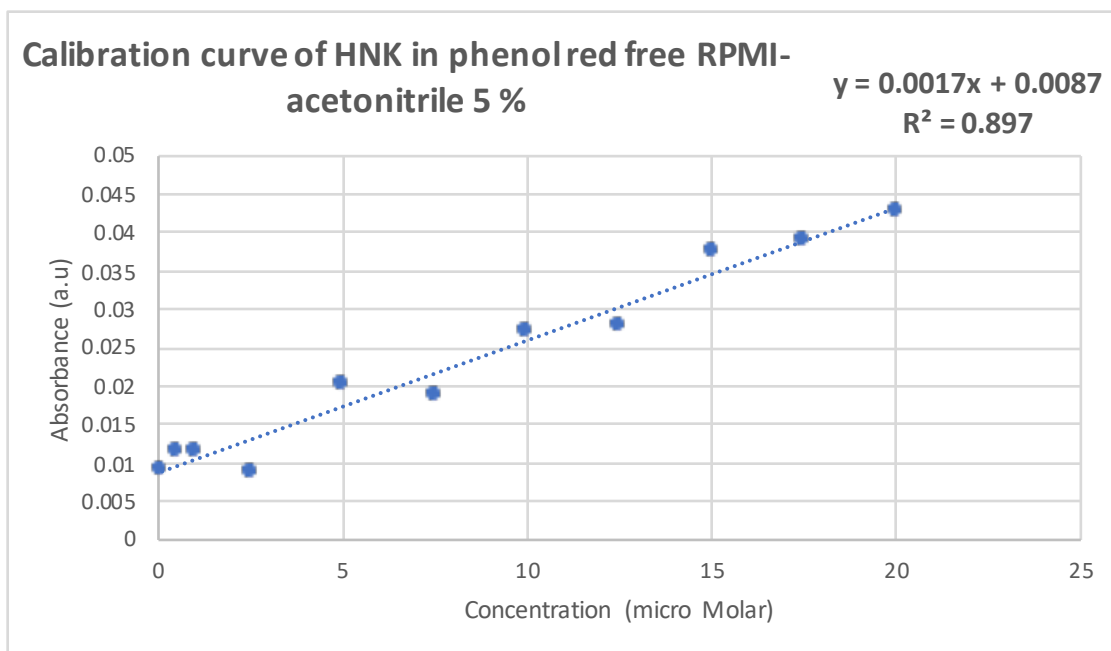

**Concentration/Absorbance Curve for Honokiol (used for Figure 2B)**



| Time (minutes) | Concentration | Percentage of HNK released |                                                 |
|----------------|---------------|----------------------------|-------------------------------------------------|
| 5              | 1.156862745   | 0.135021329                | <b>DATA SET 2</b>                               |
| 10             | 7.235294118   | 0.844455429                | <b>Cumulative release of Honokiol in 200 uL</b> |
| 15             | 9.588235294   | 1.119075081                |                                                 |
| 30             | 17.23529412   | 2.011588949                |                                                 |
| 45             | 34.29411765   | 4.002581425                |                                                 |
| 60             | 46.45098039   | 5.421449626                |                                                 |
| 90             | 55.2745098    | 6.45127332                 |                                                 |
| 120            | 78.80392157   | 9.197469838                |                                                 |
| 180            | 86.05882353   | 10.04421376                |                                                 |
| 240            | 113.5098039   | 13.2481097                 |                                                 |
| 360            | 163.5098039   | 19.0837773                 |                                                 |
| 1440           | 202.7254902   | 23.6607715                 |                                                 |
| 2880           | 250.1764706   | 29.19893448                |                                                 |

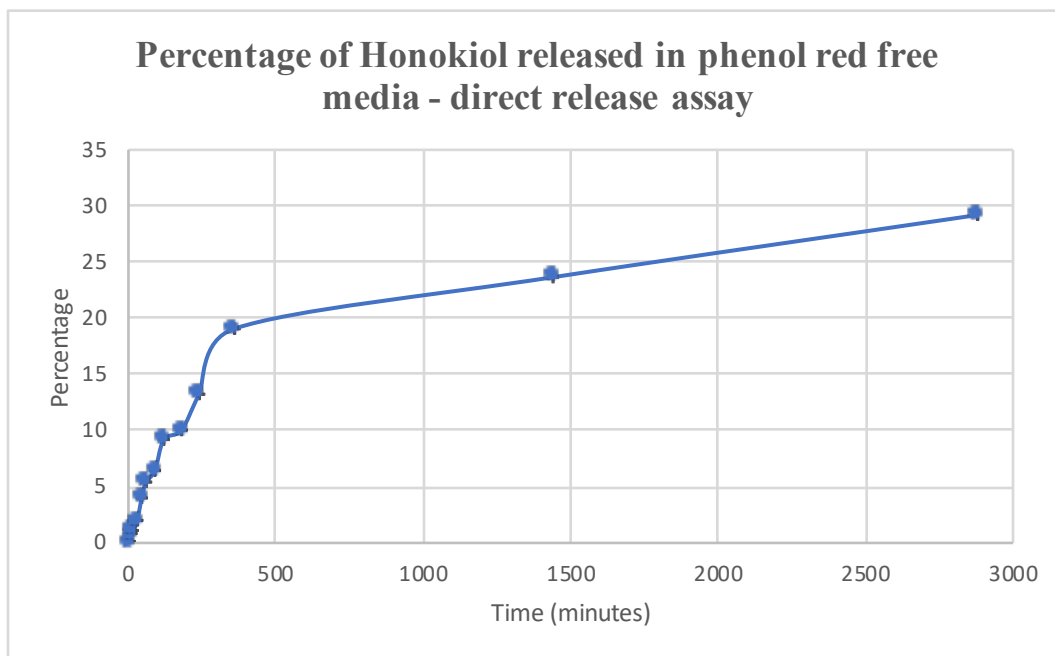

**(Additional data to support Figure-2B)**

**Figure-3A**

| Apoptotic cells Late | Early | Total | Average | S.D.       |
|----------------------|-------|-------|---------|------------|
| Control              | 1.29  | 7.04  | 8.33    |            |
|                      | 0.98  | 5.02  | 6       | 1.6475588  |
| rHNK                 | 1.76  | 11.94 | 13.7    |            |
|                      | 1.73  | 11.74 | 13.47   | 0.16263456 |
| Hnk                  | 1.87  | 9.83  | 11.7    |            |
|                      | 1.49  | 10.59 | 12.08   | 0.26870058 |

|         |        |            |
|---------|--------|------------|
| Control | 7.165  | 1.6475588  |
| rHNK    | 13.585 | 0.16263456 |
| HNK     | 11.89  | 0.26870058 |

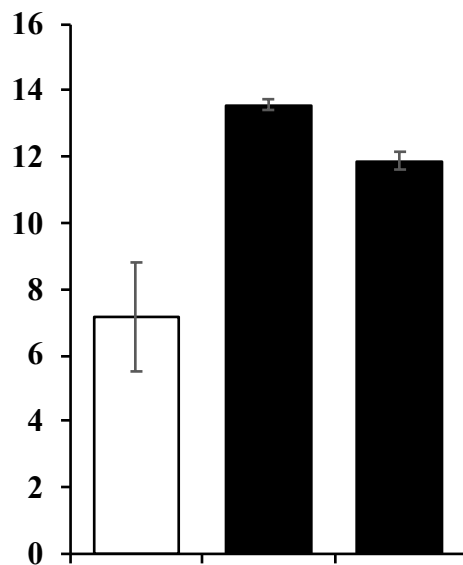

**Figure-3B**

| Apoptotic cells Late | Early | Total | Average | S.D.              |
|----------------------|-------|-------|---------|-------------------|
| Control              | 3.36  | 4.41  | 7.77    |                   |
|                      | 3.62  | 5.62  | 9.24    | 8.505 1.03944697  |
| rHNK                 | 7.38  | 10.27 | 17.65   |                   |
|                      | 8.12  | 8.6   | 16.72   | 17.185 0.65760931 |
| hnk                  | 8.82  | 7.8   | 16.62   |                   |
|                      | 5.56  | 8.66  | 14.22   | 15.42 1.69705627  |

|         |        |            |
|---------|--------|------------|
| Control | 8.505  | 1.03944697 |
| rHNK    | 17.185 | 0.65760931 |
| HNK     | 15.42  | 1.69705627 |

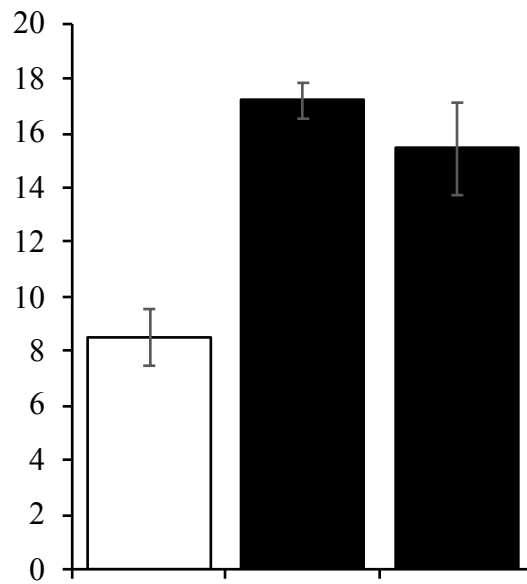

**Figure-3C (786-0 cells)**

| Apoptotic cells | Late  | Early | Total | Average | SD         |
|-----------------|-------|-------|-------|---------|------------|
| control         | 2.62  | 2.42  | 5.04  |         |            |
|                 | 2.24  | 3.88  | 6.12  | 5.58    | 0.76367532 |
| rHNK            | 10.96 | 7.02  | 17.98 |         |            |
|                 | 7.16  | 8.89  | 16.05 | 17.015  | 1.36471609 |

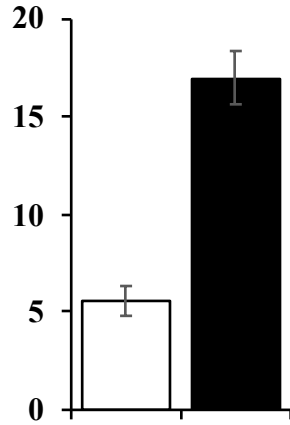

Control                    5.58 0.76367532  
rHNK                        17.015 1.36471609

**Figure-3C-ACHN cells**

| Apoptotic Cells | Early | Late | Total | Average | SD         |
|-----------------|-------|------|-------|---------|------------|
| Control         | 2.15  | 1.35 | 3.5   | 3.89    | 0.55154329 |
| rHNK            | 14.7  | 7.1  | 21.8  | 20.52   | 1.81019336 |

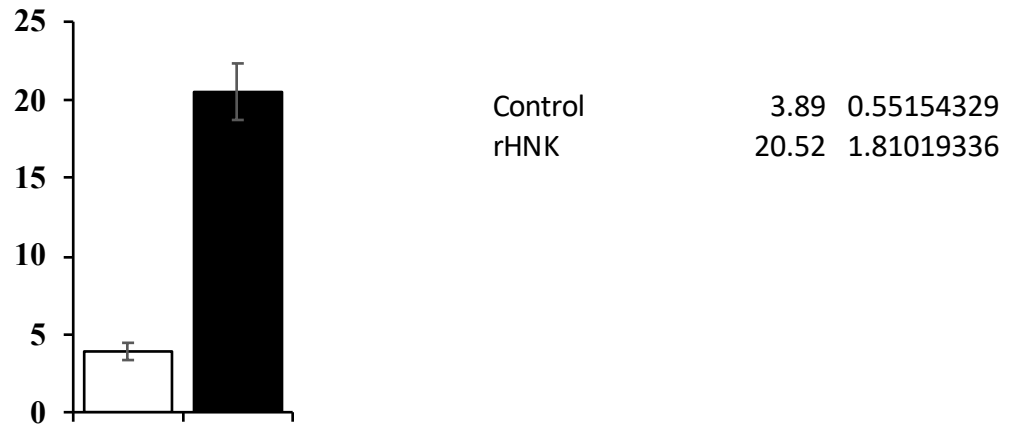

**Figure-4A-786-0 cells**

Absorbance

| Control    | HNK scaffold   |
|------------|----------------|
| 1.3        | 0.7            |
| 1.19       | 0.52           |
| 1.31       | 0.6            |
| 1.26       | 0.68           |
| 1.2        | 0.7            |
| 0.05540758 | 0.082259751 SD |

| Control | HNK Scaffold |
|---------|--------------|
| 1.252   | 0.64 Average |

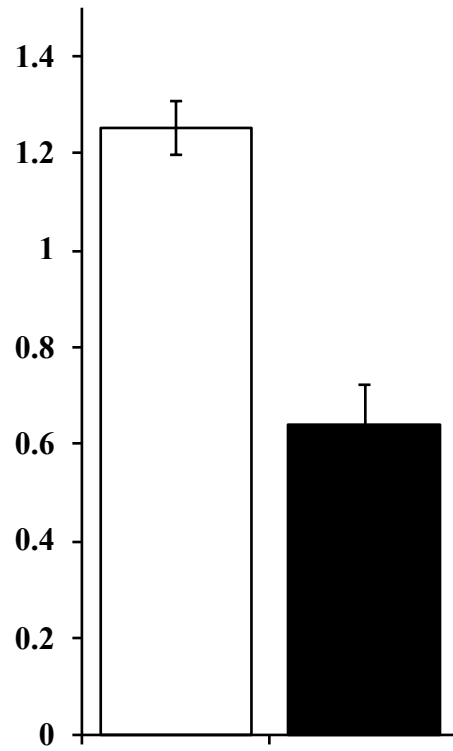

**Figure-4A-ACHN cells**

Absorbance

| control   | HNK scaffold  |
|-----------|---------------|
| 1         | 0.49          |
| 1.1       | 0.54          |
| 1.05      | 0.58          |
| 1.12      | 0.53          |
| 0.99      | 0.55          |
| 0.0580517 | 0.03696846 SD |

| control | HNK scaffold  |
|---------|---------------|
| 1.052   | 0.538 Average |

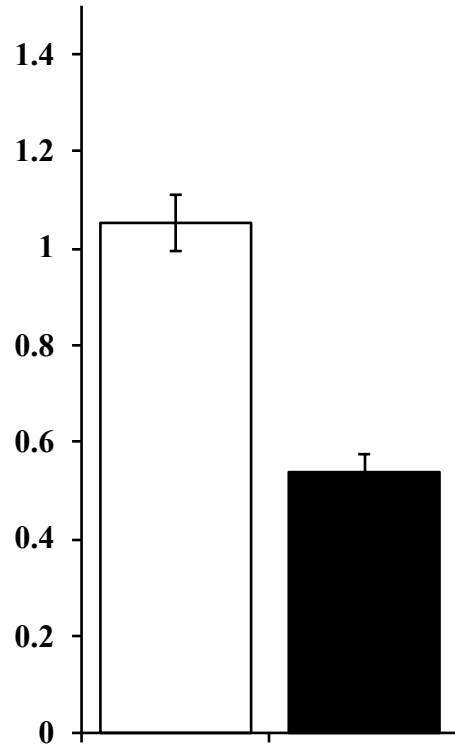

**Figure-4C**

| ACHN            | No. of cells migrated | SD  |
|-----------------|-----------------------|-----|
| Control         | 230                   | 7.5 |
| Honokiol fibers | 140                   | 4   |

| 786-O           | No. of cells migrated | SD  |
|-----------------|-----------------------|-----|
| Control         | 285                   | 8.5 |
| Honokiol fibers | 136                   | 5   |

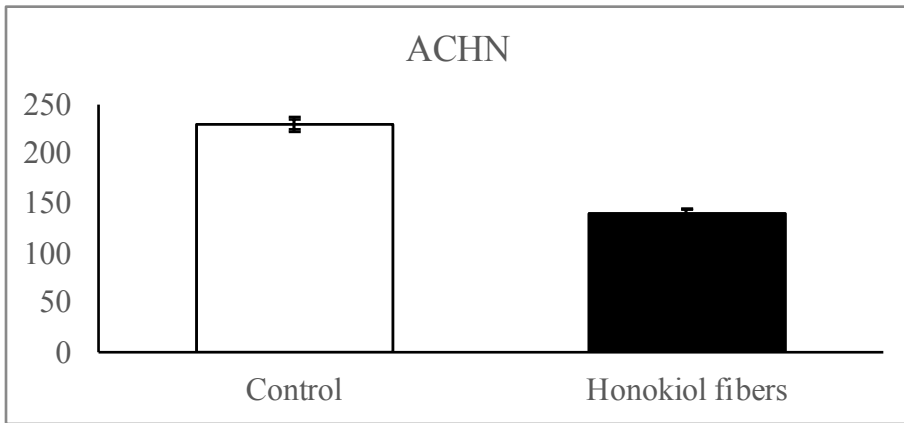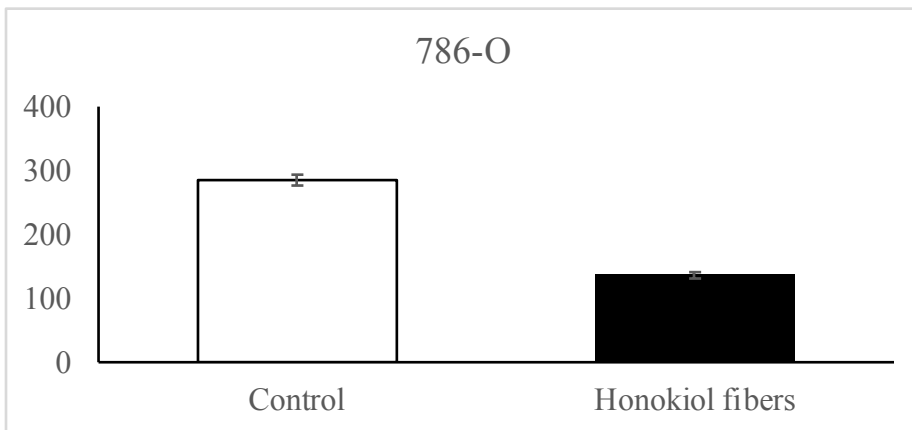



**Figure-4C**

| ACHN                  | Control    | Honokiol fibers |
|-----------------------|------------|-----------------|
| No. of cells migrated | 223        | 144             |
|                       | 229        | 140             |
|                       | 238        | 136             |
| Avg                   | 230        | 140             |
| SD                    | 7.54983444 | 4               |

| 786-O                 | Control    | Honokiol fibers |
|-----------------------|------------|-----------------|
| No. of cells migrated | 293        | 141             |
|                       | 285        | 136             |
|                       | 276        | 131             |
| Avg                   | 284.666667 | 136             |
| SD                    | 8.50490055 | 5               |
